# Supplementary material for: Mast cells promote pathology and susceptibility in tuberculosis
Source: eLife. 2026 Jan 28;13:RP102634. doi: 10.7554/eLife.102634 (PMC12851577; doi:10.7554/eLife.102634)
Supplement: Source data 1. [file elife-102634-data1.xlsx]

## Sheet: Fig 1A
Fig 1A	Fluorescent microscopy images for human healthy controls, and TB patients with early and late granuloma

## Sheet: Fig 1B
MCT in lung parenchyma/mm2	HC	Early granuloma	Late granuloma		MCTC in lung parenchyma/mm2	HC	Early granuloma	Late granuloma		MCC in lung parenchyma/mm2	HC	Early granuloma	Late granuloma
	40.5909	20.2954	40.5909			20.2954	27.0606	0			0	0	40.5909
	13.5303	13.5303	13.5303			0	20.2954	6.76515			0	0	0
	60.8863	33.8257	27.0606			6.76515	47.356	20.2954			0	0	6.76515
	33.8257	33.8257	33.8257			0	40.5909	6.76515			0	0	27.0606
	33.8257	20.2954	40.5909			13.5303	40.5909	0			0	0	27.0606
	27.0606	27.0606	33.8257			33.8257	40.5909	20.2954			0	0	0
	33.8257	20.2954	33.8257			6.76515	33.8257	6.76515				0	20.2954
		40.5909	47.356				60.8863	0				0	27.0606
		33.8257	20.2954				40.5909	20.2954				0	0
			33.8257					0					6.76515
			47.356					13.5303					20.2954
			40.5909					0					6.76515
			33.8257					0					0
			33.8257					0					6.76515
			40.5909					0					6.76515
			33.8257					6.76515					6.76515
			33.8257					0					6.76515
			27.0606					13.5303					0
			27.0606					0					13.5303
			33.8257					0					33.8257
			40.5909					13.5303					0
			40.5909					0					13.5303
			13.5303					20.2954					0
			40.5909					0					13.5303
			33.8257					0					6.76515
			60.8863					0					20.2954
			54.1212					6.76515					20.2954
			40.5909					6.76515					0
			47.356					0					20.2954
			40.5909					0					6.76515

## Sheet: Fig 1C
Fluorescent microscopy images for healthy , LTBI and PTB macaques

## Sheet: Fig1D
MCT in lung parenchyma/mm2	HC	LTBI	PTB		MCTC in lung parenchyma/mm2	HC	LTBI	PTB
	2	11	12			4	0	11
	3	10	12			5	0	7
	3	7	14			4	2	10
	2	8	16			4	5	12
	2	6	16			5	8	12
	3	8	17			5	7	11
	4		13			3		7
	4		15			7		9
	2		13			3		12

## Sheet: Fig 2A
Schematic of the experiment presented in GSE149758

## Sheet: Fig 2B
UMAP of the Mast cells

## Sheet: Fig 2C
Enriched Pathways	Cluster_ID
	2	0	1	3
IFNγ Response	0	10.0665	0	0
Oxidative Phosphorylation	0	10.0665	0	0
TNFα Signaling	21.8729	7.64397	0	0
Cholesterol Homeostasis	6.97062	0	0	0
E2F Targets	0	0	0	157.224
G2M Checkpoint	1.96257	0	0	118.74
Mitotic Spindle	0	0	9.82974	37.7258
MYC targets	5.54821	0	8.18842	33.5986
TGFβ signaling	3.76447	0	2.58838	0
negative log10 of FDR is indicated here. 0 is used for pathways that were not enriched.

## Sheet: Fig 2D
Module score Plotted on UMAP IFN signaling supplied as a Table for Figure 2- figure supplement 1C

## Sheet: Fig 2E
Module score Plotted on UMAP Oxidative Phosphorylation supplied as a Table for Figure 2- figure supplement 1D

## Sheet: Fig 2F
Module score Plotted on UMAP TNF Signaling supplied as a Table for Figure 2-figure supplement 1E

[truncated: 42 more sheets: Fig 2G, Fig 2H, Fig 2I, Fig 2J, Fig 2K, Fig 2L, Fig 2M, Fig 2N, Fig 2O, Fig 2P, Fig 3A, Fig3B, Fig 3C, Fig 3D, Fig 3E, Fig 4A, Fig4B, Fig 4C, Fig 4D, Fig 4E …]
